# Supplementary material for: Aggregate Removal Nanofiltration of Human Serum Albumin Solution Using Nanocellulose-Based Filter Paper
Source: MDPI journal article supplement (doi:10.3390/biomedicines8070209), 2020-07-13
Supplement: s1 [file s1]

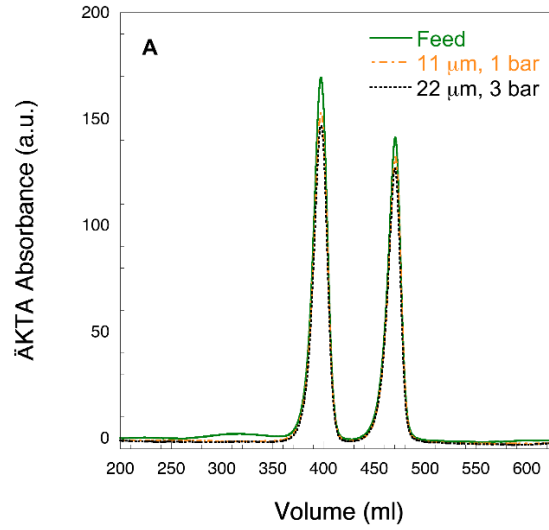

Figure S1. SEC-ÅKTA chromatography of 10 mg mL<sup>-1</sup> HSA solution at pH 7.4.

Figure S1 shows a broad peak (compared with SE-HPLC curve) representing HSA aggregates in the feed curve since Sephacryl gel column has a wider pore size distribution than analytical bioZen SEC-3 column for SE-HPLC.
